# Supplementary material for: The Structure of Maltooctaose-Bound Escherichia coli Branching Enzyme Suggests a Mechanism for Donor Chain Specificity
Source: MDPI journal article supplement (doi:10.3390/molecules28114377), 2023-05-27
Supplement: s1 [file s1]

# Supporting Information

## The Structure of Malto-Octaose bound *Eschericia coli* Branching Enzyme Suggests a Mechanism for Donor Chain Specificity

### Table of contents

|                                 |     |
|---------------------------------|-----|
| A. Figure S1.....               | 3-4 |
| B. Figure S2.....               | 5   |
| C. Figure S3.....               | 6   |
| D. Figure S4.....               | 7   |
| E. Crystallographic Table ..... | 8   |

|                                  |     |                                                                                                        |     |
|----------------------------------|-----|--------------------------------------------------------------------------------------------------------|-----|
| <i>E.coli</i> /1-728             | 92  | QNLIDDPYRF-GPLIQEMDA-----WLLSEGLHLRPYETLCAHADTMD---GVTGTRFSVWAPNARRVSVVGGFNYWDGRRHMPMR LRKESG          | 173 |
| <i>Klebsiella</i> /1-728         | 92  | QNLIDDPYRF-GPLIQDLVD-----WLLSEGLHLRPYETLCAHADTMD---GVVGTRFSVWAPNARRVSVVGGFNYWDGRRHMPMR LRKESG          | 173 |
| <i>Y.Pestis</i> /1-727           | 92  | PQIIIDDPYRF-GPLIQDIDS-----WLLAEGLHLRPYERLCAHLSLD---GVSGVSFAVWAPNAQRVSVVGGFNFWDGRRHMPMR LRRENG          | 173 |
| <i>AgroTum</i> /1-735            | 101 | EWAVTDPYSF-GPVLGPMDD-----YFVREGSHLRLLFDRMGCAHP LKLE---GVEGFHFAVWAPNARRVSVVGGFNNWDGRRHVMR FRKDTG        | 182 |
| <i>MycroTub</i> /1-722           | 87  | EPHTVADAYRF-LPTLGEVDL-----HLFAEGRHERLWEVLGAHPRSF TTDAGVVS GVSFAVWAPNAKGVSLIGFNGWNGHEAPMRVLGP SG        | 173 |
| <i>RhodotermObam</i> /1-621      | 1   | -----MSWLTEEDI-----RRWESGTFYDSYRKLGHPDD-----EGTWFCVWAPHADGVSVLGAFNDWNPEANPLERY-GGG                     | 67  |
| <i>Cyano</i> /1-793              | 115 | EKVYDPYAFSSPYLTDEDI-----YLFSEGNHHRIFYEKLGAHVGEIN---GVKGVYFAVWAPNARNVSVIGDFNNWDGRRHMQMRKR-NYT           | 196 |
| <i>Bac.Subtil</i> /1-627         | 1   | -----MAAASPTAHDV-----YLFHEGSLFKSYQLFGSHYRELN---GKSGYFCVWAPHASEVRVAGDFNSWSGEEHVMHRVNDNG                 | 74  |
| <i>Bac.Caldo</i> /1-666          | 1   | -----MIAANPTDLEV-----YLFHEGRLYQSYELFGAHVIRGG---GAVGTRFCVWAPHAREVRLVGSFNDWNGTNSPLTKVNDNG                | 74  |
| <i>Bac.Stearothermoph</i> /1-652 | 1   | -----MIAANPTDLEV-----YLFHEGSLYKSYELFGAHVINEG---GKVGTRFCVWAPHAREVRLVGSFNDWNGTDFRLEKVNDEG                | 74  |
| <i>Yeast</i> /1-704              | 22  | ADVLSERRYLADKWLYDITATPDGSSYQSLSKFARDSSKSYGLHANPET---KEITYKEWAPNAERAFLVGDFNNWDTTSHELKNKDEFG             | 108 |
| <i>Rice</i> /1-755               | 24  | KDHFNYRIKRYLDQKCLIEK-----HEGGLLEEFSGKYLKFGINTVD---GATIIYREWAPAAQEAQLIGDFNNWNGAKHKMEKD-KFG              | 101 |
| <i>Potato</i> /1-861             | 109 | LDHFRHRMKRYVDQKMLIEK-----YEGPLEEFAQGYLKFGRNED---GCIVYREWAPAAQEDVIGDFNCGNGSNHMMEKD-QFG                  | 186 |
| <i>Arab</i> /1-858               | 171 | RNHLDYRYQYRKLRLEEIDK-----NEGGLEAFSGRYEFGFTRSA---TCITYREWAPAKAASLIGDFNNWNAKSDVMARN-DFG                  | 248 |
| <i>HomoSap</i> /1-702            | 42  | AVDFQRRYKQFSQILKNIGE-----NEGGIDKFSRCYESFVHRCAD-----GGLYCKEWAPAGEVFLTGDFNGWNPFSYPYKKL-DYG               | 120 |
| <i>E.coli</i> /1-728             | 174 | IWELFIPGA-----HNCQLYKYEMIDANG-NLR LKSDPYAFEAQMRPETA---SLICGL-----PEKVV---QTEERKKANQFDAPIS IY           | 246 |
| <i>Klebsiella</i> /1-728         | 174 | IWELFVPGA-----LNCQLYKFELIDAHG-NLRVKSDPYAFEAQMRPESA---SLICGL-----PEKVA---QPPERKKANQFDAPIS IY            | 246 |
| <i>Y.Pestis</i> /1-727           | 174 | IWELFLPGI-----EAGEVYKFEIIDCHG-QVRLKADPYAFEAQMRPETA---SLISQL-----PDVVK---SSAARQKANDLCSPVSIY             | 246 |
| <i>AgroTum</i> /1-735            | 183 | IWEIFAPDV-----YAGCAYKFEVLGANGELLPLKADPYARRAELRPKNA---SVTAP E---LTQKWEDQAHREHWAQVDQRQRP I S IY          | 260 |
| <i>MycroTub</i> /1-722           | 174 | IWELFWPDP-----PCDGLYKFRVHGADG-VVTDRAADPYAFGETVPPQTA---SRVTS---SDYTGWDDWMAKRALRPVNEAMSTY                | 249 |
| <i>RhodotermObam</i> /1-621      | 68  | LWAGYVPGA-----RP GHTYKYRI RHGF---YQADKTDPAFYAMEPRTGSP IEGLAS I ITR---LDYTWHDDDEWRRKRGASLYEPVSIY        | 147 |
| <i>Cyano</i> /1-793              | 197 | IWELFVPEI-----GSGTVYKYEIKNSEG-HIYEKSDPYAGYERVPNTA---SIVVDI---DNIIQWHDDEWLKRRNSDPLKQPSVSY               | 274 |
| <i>Bac.Subtil</i> /1-627         | 75  | IWTLFIPGI-----GEKERYKYEIVTNNC-EIRLKADPYAIYSEVRPNTA---SLTYDL---EGYSWQDQKQWKKQKAKTLYEKPVIY               | 151 |
| <i>Bac.Caldo</i> /1-666          | 75  | VMTIVVPE-----LEGHLYKYEIITPDG-RVLLKADPYAFYSELRPHTA---SIVYDL---KGYEWNDSPWKRKKRRRIYDQPMVIY                | 151 |
| <i>Bac.Stearothermoph</i> /1-652 | 75  | VMTIVVPE-----LEGHLYKYEIITPDG-QVLFKADPYAFYSELRPHTA---SIAYDL---KGYEWNDSPWKRKKRRRIYDQPMVIY                | 151 |
| <i>Yeast</i> /1-704              | 109 | NFTITLHPLNGDFAIPHDSKIVMFI LPDG-SKIFRLPAWITRATOPSKET---SKQFGPAYEGRFVWPNKPYKFVHPRPKPSESVDSLRIY           | 197 |
| <i>Rice</i> /1-755               | 102 | ISIKISHVN-GKPAIPHNSKVKFRFRHGGG-AWVDRI PAWIRYATFDASKF---GAPYDG---VHWDPPACERYVFKHPRPKPDAPRIY             | 184 |
| <i>Potato</i> /1-861             | 187 | VMSIRIPDVG-SKPVIPHNSRYKFRFKHNG-VWVDRI PAWIKYATADATKF---AAPYDG---VYWDPPPSERYHFYKPRPKPRAPRIY             | 269 |
| <i>Arab</i> /1-858               | 249 | VWEIFLPPNADGSPAIPHGSRYKIRMDTPS-GIKDSIPAWIKYSVQPPGEI---PYNG---VYDPP EEDKYAFKHPRPKKPTSLRIY               | 329 |
| <i>HomoSap</i> /1-702            | 121 | KWELYIPPKQNKSVLPVHGSKLVVITSKSG-EILYRISPAWKYVVR EGDNV---NYDW-----IHWDP EHSYEFKHSRPPKPRSLRIY             | 200 |
| <i>E.coli</i> /1-728             | 247 | EVHLGSWRRHTD-----NNFWLSYRELADQLVPYAKWMGFTHLELLPINEHFDG SWGYQPTGLYAPTRRFGTTRDDFR                        | 319 |
| <i>Klebsiella</i> /1-728         | 247 | EVHLGSWRRHTD-----NNFWLSYRELADQLVPYAKWMGFTHLELLPINEHFDG SWGYQPTGLYAPTRRFGTTRDDFR                        | 319 |
| <i>Y.Pestis</i> /1-727           | 247 | EVHLGSWRRHTD-----NNFWLSYRELADQLVEYVKYMGFTHVELLPINEHFDG SWGYQPLGLYAPTRRRYGTTFEDFK                       | 319 |
| <i>AgroTum</i> /1-735            | 261 | EVHAGSWQRR E-----DGTFLSWDELAALIPYCTDMGFTHIEFLPITEHPYDP SWGYQPTGLYAPSAFGDP EGF A                        | 332 |
| <i>MycroTub</i> /1-722           | 250 | EVHLGSWRP-----GLSYRLARELTDYIVDQGFTHVELLPVAEHPFAGSWGYQVTSYAPTSRFGTTPDDFR                                | 316 |
| <i>RhodotermObam</i> /1-621      | 148 | EVHLGSWRHRR-----PGESFYREIAEP LADYVQEMGFTHVELLPVEHPPYGSWGYQVVGYYAPTFRYGSQDLM                            | 219 |
| <i>Cyano</i> /1-793              | 275 | EVHLGSWLHGSSAEKMP LLNGEADPVI VSEWNP GARFLSYELAEKLI PYVKDMGYTHIELLP IAEHPFDG SWGYQVTFGYSPTSRFRGPEDFM    | 368 |
| <i>Bac.Subtil</i> /1-627         | 152 | ELHLGSWKKHS-----DGRHYSYKELSQTLIPYIKEHGFTHIELLPVYEHPPYDR SWGYQGTGYSPTSRFGCPHDLM                         | 223 |
| <i>Bac.Caldo</i> /1-666          | 152 | ELHFGSWKKKP-----DGRFYTYREMADELI SYVLDHGFTHIELLP LVEHPLDR SWGYQGTGYAVTSRYGTPHDFM                        | 222 |
| <i>Bac.Stearothermoph</i> /1-652 | 152 | ELHFGSWKKK-----DGRFYTYREMADELI SYVLDHGFTHIELLP LVEHPLDR SWGYQGTGYAVTSRYGTPHDFM                         | 222 |
| <i>Yeast</i> /1-704              | 198 | EAHVGISSPE-----PKITTYKEFTEKVLPRIKLYGDAIQLMAIMEHAYYASFGYQVTNFFAASSRFGTPEELK                             | 267 |
| <i>Rice</i> /1-755               | 185 | EAHVGMSSGE-----PEVSTYREFADNVLPRI RANNYNTVOLMAIMEHSYYASFGYHVTNFFAVSSRSRGTPEDLK                          | 254 |
| <i>Potato</i> /1-861             | 270 | EAHVGMSSSE-----PRVNSYREFADNVLPRI RANNYNTVOLMAIMEHSYYGSGFYHVTNFFAVSSRSRGNPDLK                           | 339 |
| <i>Arab</i> /1-858               | 330 | ESHVGMSSSTE-----PKINTYANFRDDVLPRI KKLGYNAVQIMAIQEHAYYASFGYHVTNFFAVSSRSRGTPEDLK                         | 399 |
| <i>HomoSap</i> /1-702            | 201 | ESHVGISSHE-----GKVASYKHFTCNVLPRI KGLGYNCIQLMAIMEHAYYASFGYQITSSFAASSRYGSP EELQ                          | 270 |
| <i>E.coli</i> /1-728             | 320 | YFIDAHAAGLNVILDWVPGHFPPTDD-FALAE FDG---TNLYEHSDPREGYHQDWNTLIYNYGRREVS NFLVGNALYWI ERFGIDAL RVD AVAS    | 409 |
| <i>Klebsiella</i> /1-728         | 320 | YFINAAHAAGLNVILDWVPGHFPADD-FALAS FDG---TSLYEHSDPREGYHQDWNTLIYNYGRREVS NLYVGNALYWI ERFGIDAL RVD AVAS    | 409 |
| <i>Y.Pestis</i> /1-727           | 320 | AFVAKFHQAGINVLIDWVPGHFP SDE-HGLST FDG---TALY EYADPREGYHQDWNTLIYNYGRREVRNYLACNAFYWMERFGIDAL R I D AVAS  | 409 |
| <i>AgroTum</i> /1-735            | 333 | RFVNGAHKVGICGVLLDWVPAHFP TDE-HGLRW FDG---TALYEHADPRQGFHPDWNTAIYNFGR I EVMSYLLINNALYWAEFHLDGLRVD AVAS   | 422 |
| <i>MycroTub</i> /1-722           | 317 | ALVDA LHQAGIGVILDWVPAHFP KDA-WALGR FDG---TPLYEHSDPKRGEQLDWCTYVDFGRPEVRNFLVANALYWLQEFHIDGLRVD AVAS      | 406 |
| <i>RhodotermObam</i> /1-621      | 220 | YLIDYLHQRCIGVILDWVPSHFAADP-QGLVF FDG---TTLFEYDDPKMRYHPDWCTYVDFYKNPKGVRNFLI SNAFLWLEKYHVDGLRVD AVAS     | 309 |
| <i>Cyano</i> /1-793              | 369 | YFVDKCHENGIGVILDWVPGHFPKDS-HGLAY FDG---THLYEHADPR I GEHKWGT LVFNRYGRHEVRNFLVANVLFWFDKYHYVDGIRVD AVAS   | 458 |
| <i>Bac.Subtil</i> /1-627         | 224 | KFVDECHQQNIGVILDWVPGHFCCKDA-HGLYM FDG---EPLYEYKEERDRENWLGTANFDLGKPEVHSFLI SNAFLYWAFFYHIDGFRVD AVAN     | 313 |
| <i>Bac.Caldo</i> /1-666          | 224 | YFVDRCHQAELGVILDWVPGHFCCKDA-HGLYM FDG---APT YEYANEKDR ENYVWGTCANFDLGKPEVRSFLI SNAFLWLEYYHYVDGFRVD AVAN | 313 |
| <i>Bac.Stearothermoph</i> /1-652 | 223 | YFVDRCHQAELGVIMDWVPGHFCCKDA-HGLYM FDG---APT YEYANEKDR ENYVWGTCANFDLGKPEVRSFLI SNAFLWLEYYHYIDGFRVD AVAN | 312 |
| <i>Yeast</i> /1-704              | 268 | ELIDTAHSMGILVLLDVVHSHASKNVEDGLNMF DG-SDHOYFHSISSGRGEHPLWDSRLFN YGKFEVQRFLLANLAFYVDVYQFDGFRFDGVT S      | 360 |
| <i>Rice</i> /1-755               | 255 | YLVDKAHS LGLRVLDVHSHASNNVT DGLNGYDVGNQTHESYFHTGDRGYHKLWDSRLFN YANWEVLR FLLSNLRYWMOEFMFDGFRFDGVT S      | 348 |
| <i>Potato</i> /1-861             | 340 | YLIDKAHSLGLQVLVDVHSHASNNVT DGLNGYDVGGSQESYFHAGERGYHKLWDSRLFN YANWEVLR FLLSNLRWLLEENFDGFRFDGVT S        | 433 |
| <i>Arab</i> /1-858               | 400 | SLIDKAHELGLVLMDOI VSHASKNTLDGLDM FDG---TDGQYFHS GSRGYHMMWDSRLFN YGSWEVLR YLLSNARWLLEEKFDGFRFDGVT S     | 490 |
| <i>HomoSap</i> /1-702            | 271 | ELVDTAHSMTIIVLLDVVHSHASKNSADGLNMF DG-SDSCYFHS GPRGTHDLWDSRLFAYS SWEVLR FLLSNIRWLLEEYRFDGFRFDGVT S      | 361 |

- site I
- site II
- site III
- site IV
- site V
- site VI
- site VII
- site VIII
- site IX
- site X
- site XI
- site XII

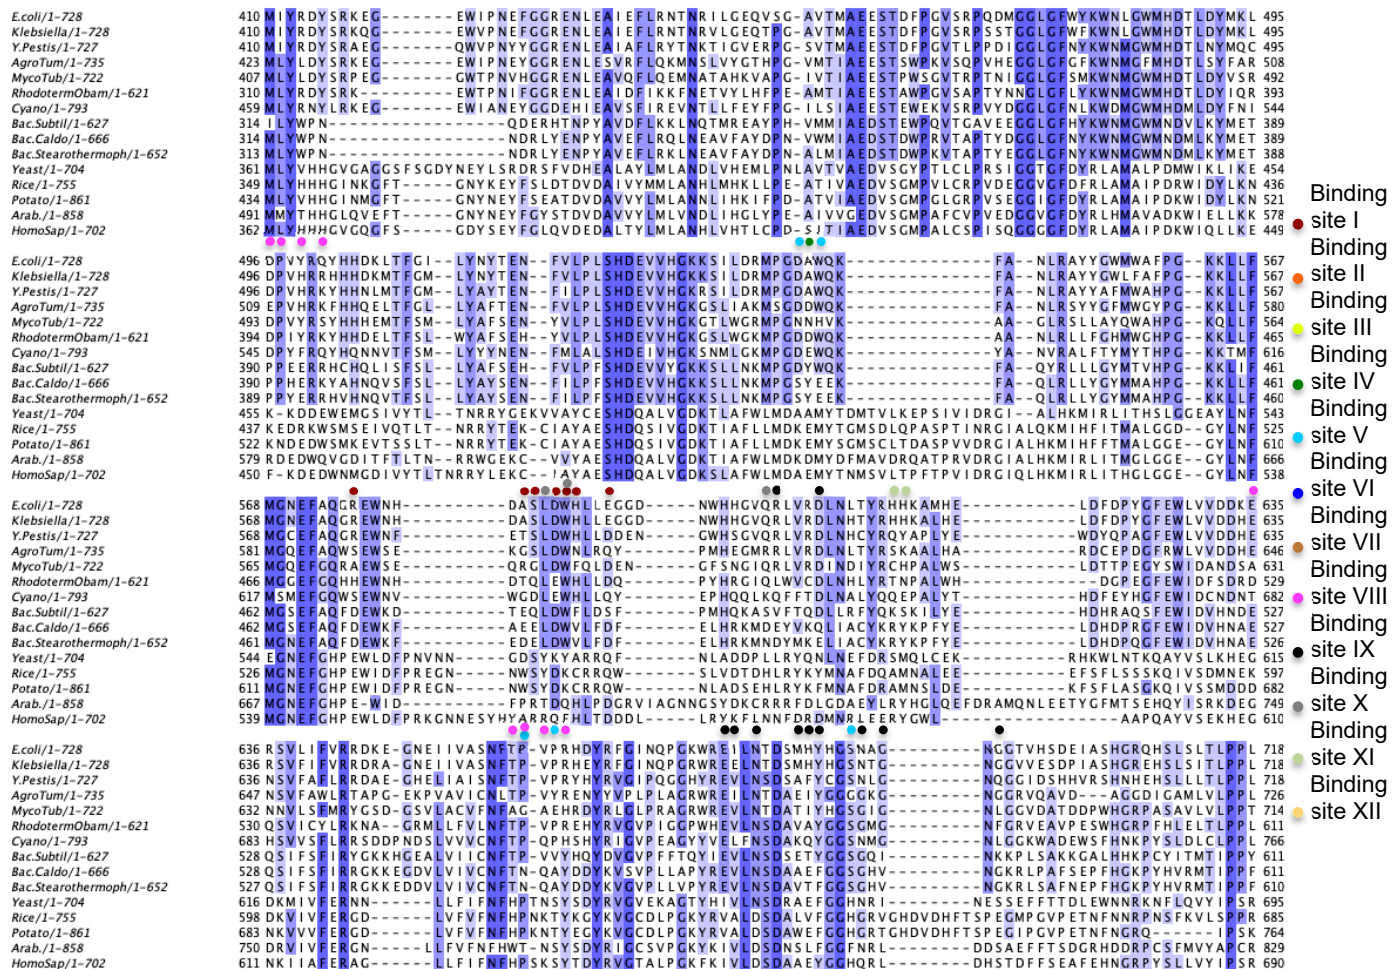

Figure S1. Sequence alignment of Branching Enzymes from various organisms. Identical residues are shown in blue. Amino acids in each binding site are shown in blue.

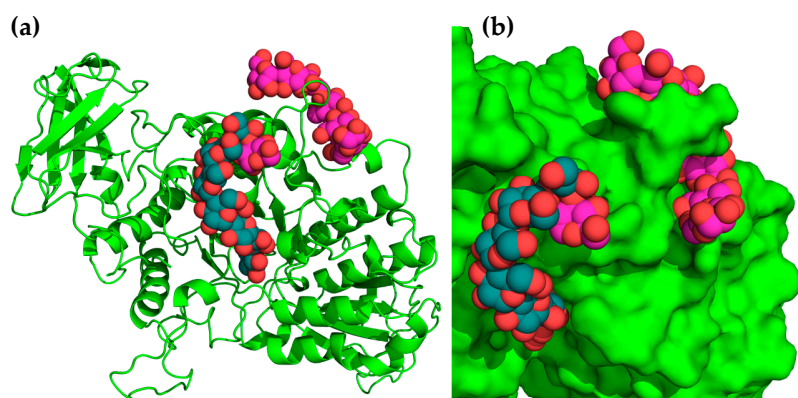

Figure S2. Site XII is close to the path of the donor chain. **(a)** The glucans bound in site I and XII (spheres, C, pink) of M8-bound EcBE (green ribbon) are shown with the M7 donor chain (spheres, C, blue-green) from the *Cyanospora* BE structure modeled into the structure. **(b)** EcBE is represented as a surface.

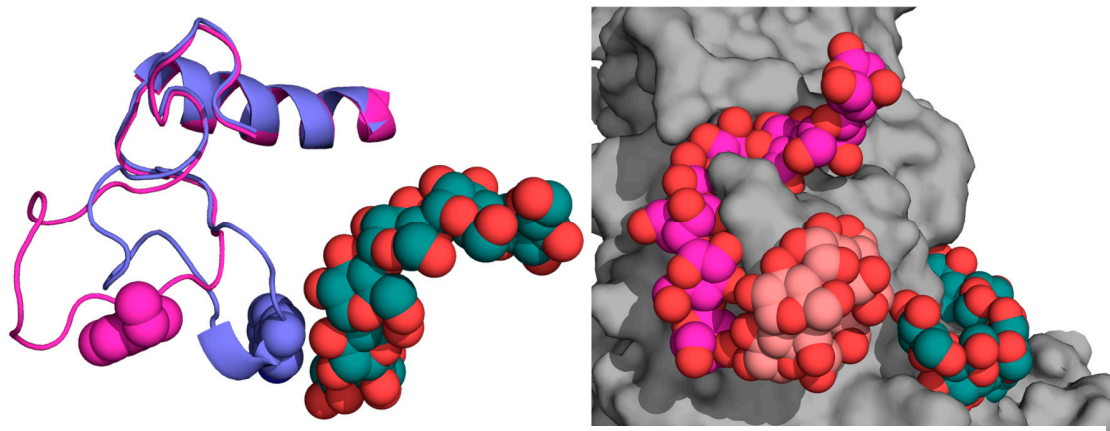

Figure S3. Overlay of the W399 loops from *Mycobacterium tuberculosis* (pink) and *Cyanothece* (blue) BE's. The active-site bound M7 donor chain from *Cyanothece* is shown as spheres, with C atoms colored blue-green. Right, M8-bound EcBE (grey surface) showing the site one bound glucan (Pink C atoms), with the cyclodextrin bound in site from the alpha-CD-bound EcBE structure (light red C atoms) and the *Cyanothece* M7 donor chain modeled onto the structure.



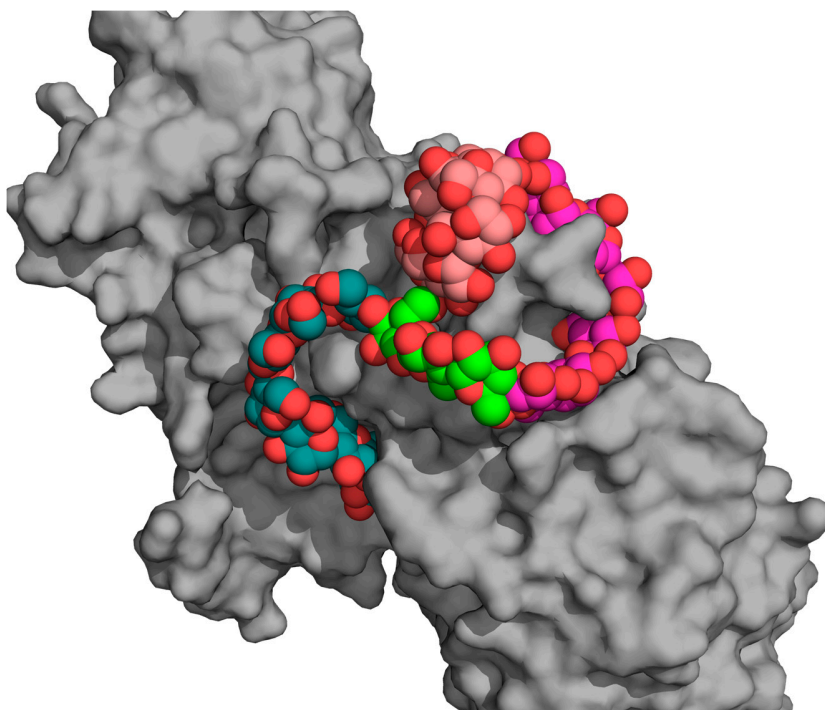

Figure S4. M8-bound EcBE structure showing site I-bound M8 (spheres, C, pink) with alpha-CD modeled into site VII (based on the alpha-CD bound EcBE structure, spheres, C, light red), active site bound M7 from *Cyanotheca* BE modeled into the active site (spheres, C, blue-green) representing the donor strand and three malto-oligosaccharides connecting M8 and the modeled donor strand showing how site I could represent the binding surface of the longer donor strand characteristic of *E. coli* BE.

Table SI. Data collection and refinement statistics M8-bound EcBE.

|                                        |              |
|----------------------------------------|--------------|
| Wavelength (Å)                         | 0.978        |
| Resolution Range (Å)                   | 38.85 – 3.00 |
| Space group                            | P3221        |
| a (Å)                                  | 146.489      |
| b (Å)                                  | 146.489      |
| c (Å)                                  | 294.92       |
| a (°)                                  | 90           |
| b (°)                                  | 90           |
| γ (°)                                  | 120          |
| Molecules per Asymmetric Unit          | 4            |
| Total reflection                       | 1065049      |
| Unique Reflection                      | 71397        |
| Multiplicity                           | 2.1          |
| Completeness (%)                       | 96.33        |
| Average I/s                            | 22.9         |
| R <sub>merge</sub> (%)                 | 0.14         |
| R <sub>work</sub> (%)                  | 0.2139       |
| R <sub>free</sub> (%)                  | 0.3152       |
| Reflections used in refinement         | 71269        |
| Reflections used for R <sub>free</sub> | 3615         |
| RMSD from ideal values                 |              |
| Bond Angle                             | 1.36         |
| Bond Length (Å)                        | 0.012        |
| Average B factor                       | 69.29        |
| Number of water molecules              | 473          |
| PDB ID                                 | 8SDB         |
